# Supplementary material for: Glioma-targeted dual functionalized thermosensitive Ferri-liposomes for drug delivery through an in vitro blood–brain barrier
Source: Royal Society of Chemistry journal article supplement (doi:10.1039/c9nr03931g), 2019-01-01
Supplement: c9nr03931g1.pdf [file c9nr03931g1.pdf]

**Glioma-targeted Dual Functionalized Thermosensitive Ferri-Liposomes for Drug Delivery  
through an *in vitro* Blood-brain Barrier**

Di Shi<sup>1</sup>, Gujie Mi<sup>1</sup>, Yan Shen<sup>2</sup> and Thomas J Webster<sup>1</sup>

<sup>1</sup>Chemical Engineering Department, Northeastern University, Boston, MA 02115, USA

<sup>2</sup>State Key Laboratory of Natural Medicines, Department of Pharmaceutics, China  
Pharmaceutical University, 24 Tongjiaxiang, Nanjing 210009, China

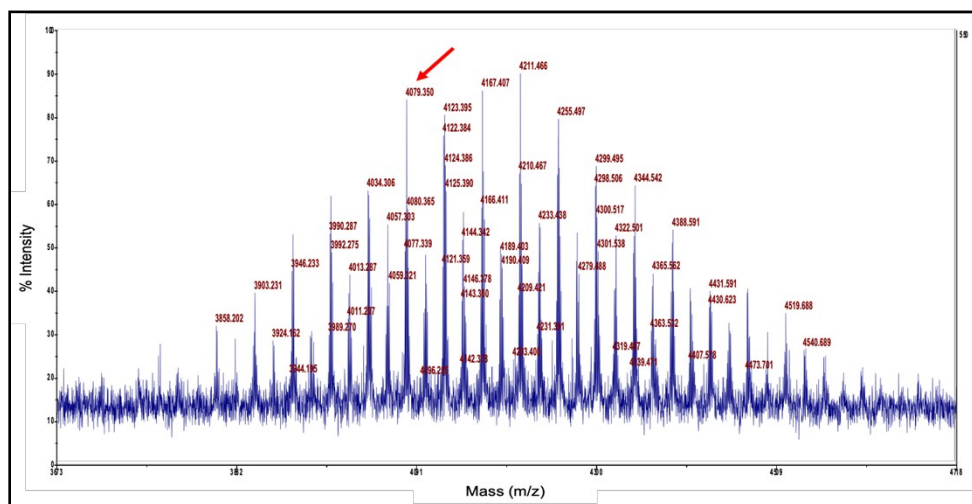

Figure S1. MALDI-TOF Mass Spec of Conjugated DSPE-PEG<sub>2000</sub>-P1NS (MW= 4078.6).

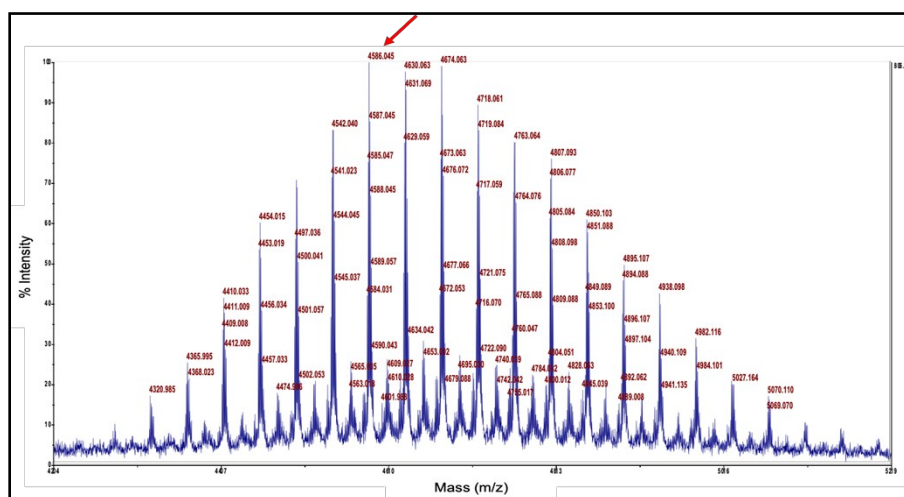

Figure S2. MALDI-TOF Mass Spec of Conjugated DSPE-PEG<sub>2000</sub>-TAT (MW= 4587.6).

**Table S1. DLS and Zeta Potential Data**

| <b>Samples</b>                                   | <b>Size (nm)</b> | <b>Polydispersity Index (PDI)</b> | <b>Zeta (mV)</b> |
|--------------------------------------------------|------------------|-----------------------------------|------------------|
| <b>Plain LPs</b>                                 | 120.2 ± 0.31     | 0.149 ± 0.04                      | -1.69 ± 2.73     |
| <b>Non-PEGyated P1NS/TNC-FeLPs</b>               | 103.7 ± 0.83     | 0.171 ± 0.02                      | 2.26 ± 2.41      |
| <b>PEGyated P1NS/TNC-FeLPs</b>                   | 114.2 ± 0.48     | 0.218 ± 0.07                      | -4.85 ± 3.03     |
| <b>PEGyated P1NS/TNC-FeLPs<br/>after 5 weeks</b> | 107.9 ± 0.64     | 0.192 ± 0.05                      | ---              |

**Table S2. DLS results for liposomes incubated at pH4.5 and pH 7.4**

| <b>Time (hrs)</b> | <b>pH 4.2</b>                |             | <b>pH 7.4</b>                |             |
|-------------------|------------------------------|-------------|------------------------------|-------------|
|                   | <b>Average Diameter (nm)</b> | <b>PDI%</b> | <b>Average Diameter (nm)</b> | <b>PDI%</b> |
| 1                 | 138.2                        | 19.9        | 159.6                        | 23.6        |
| 4                 | 147.5                        | 25.6        | 137.0                        | 26.1        |
| 8                 | 120.7                        | 24.9        | 146.6                        | 30.9        |

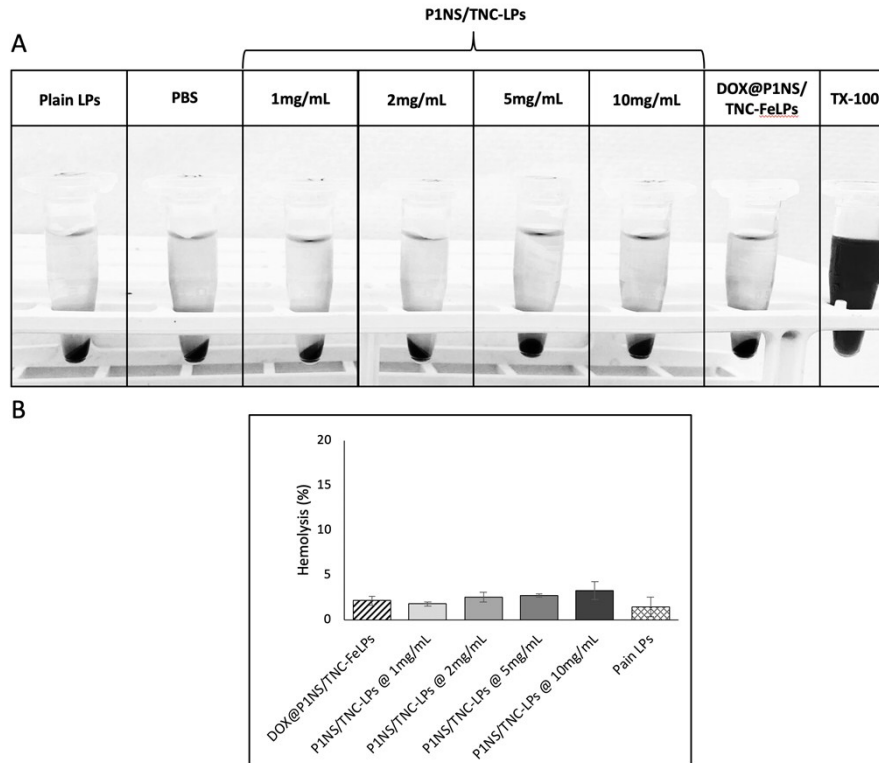

**Figure S3.** Hemolysis results for different liposome compositions. (A) Photo images of vials containing supernatant from rat erythrocytes (red blood cells) exposed to different concentrations of P1NS/TNC-LPs and/or DOX@P1NS/TNC-FeLPs at experimental concentration. (B) Hemolysis (%) of erythrocyte incubated with different liposomal compositions at varying concentrations. Less than 10% hemolysis was considered nontoxic.
